# Supplementary material
Source: publisher figshare collection journal article supplement (https://rs.figshare.com/ndownloader/files/38731513)
Supplement: Supplementary file 1 [file 38731513]

**Supplementary material: Directional fabrication and directional dissolution of larval and juvenile oyster shells under ocean acidification**

*Kanmani Chandra Rajan 1*‡, Yang Li 1‡, Xin Dang 1, Yong Kian Lim 1,2, Michio Suzuki* *3, Seung Woo Lee 4, Thiyagarajan Vengatesen 1**

1 School of Biological Sciences, Swire Institute of Marine Science, The University of Hong Kong, Hong Kong SAR.

2 Centre for Aquaculture and Veterinary Science & School of Applied Science, Temasek Polytechnic, 529757, Singapore.

3 Graduate School of Agricultural and Life Sciences, The University of Tokyo, Japan.

4 Korea Institute of Geoscience and Mineral Resources, Daejeon, Republic of South Korea.

* Corresponding authors: KCR – [kanmani@hku.hk](mailto:kanmani@hku.hk) VT - [rajan@hku.hk](mailto:rajan@hku.hk)

**Table S1:** Summary of seawater carbonate chemistry. Representative values of carbonate system parameters in different pH treatments in controlled hatchery condition (n = 3, ±SD). The partial pressure of carbon dioxide (pCO2), carbonate ion concentration (CO32-), calcite saturation state (ΩCa in), and aragonite saturation state (ΩAr in) were calculated from total alkalinity (µmol kg-1), pH (NBS Scale), temperature (o C) and salinity (o/o o) at different life history stages using CO2SYS. This experimental samples were collected as part of the other published experiment from our laboratory (Lim, Dang et al. 2021).


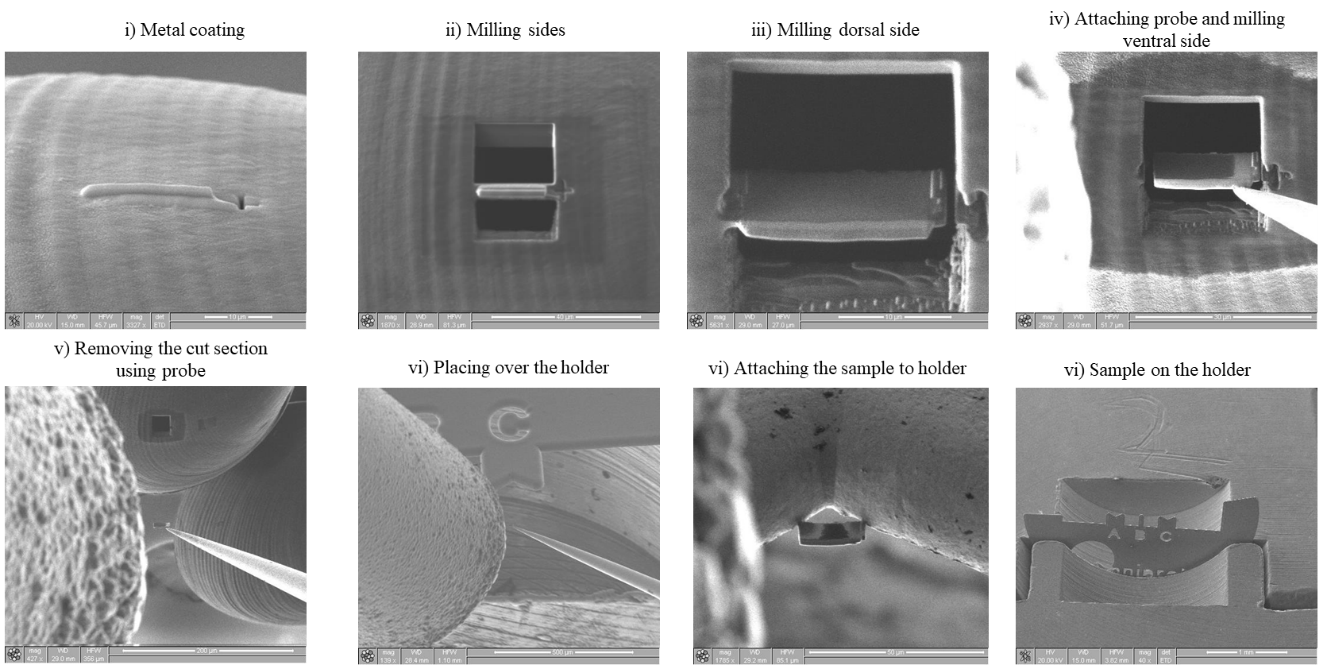


**Figure S1:** Focused Ion Beam – SEM – larval shell cross section fabrication steps.


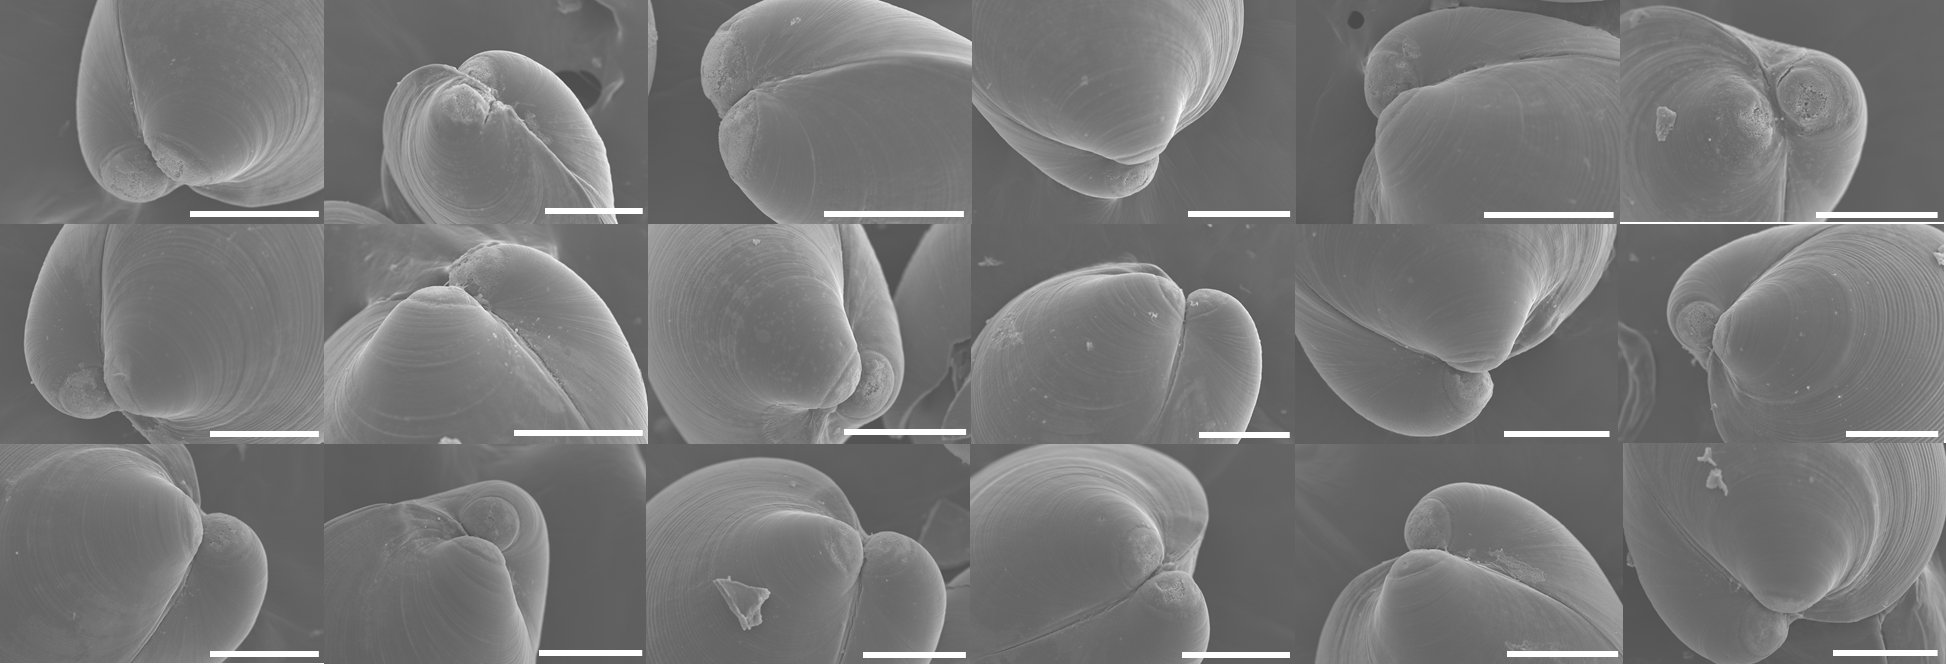


**Figure S2:** Larval shell dissolution near hinge in OA-OA condition – replicates from all the three replicate tanks (6 replicates from each tank). Scale bar: 100 µm.


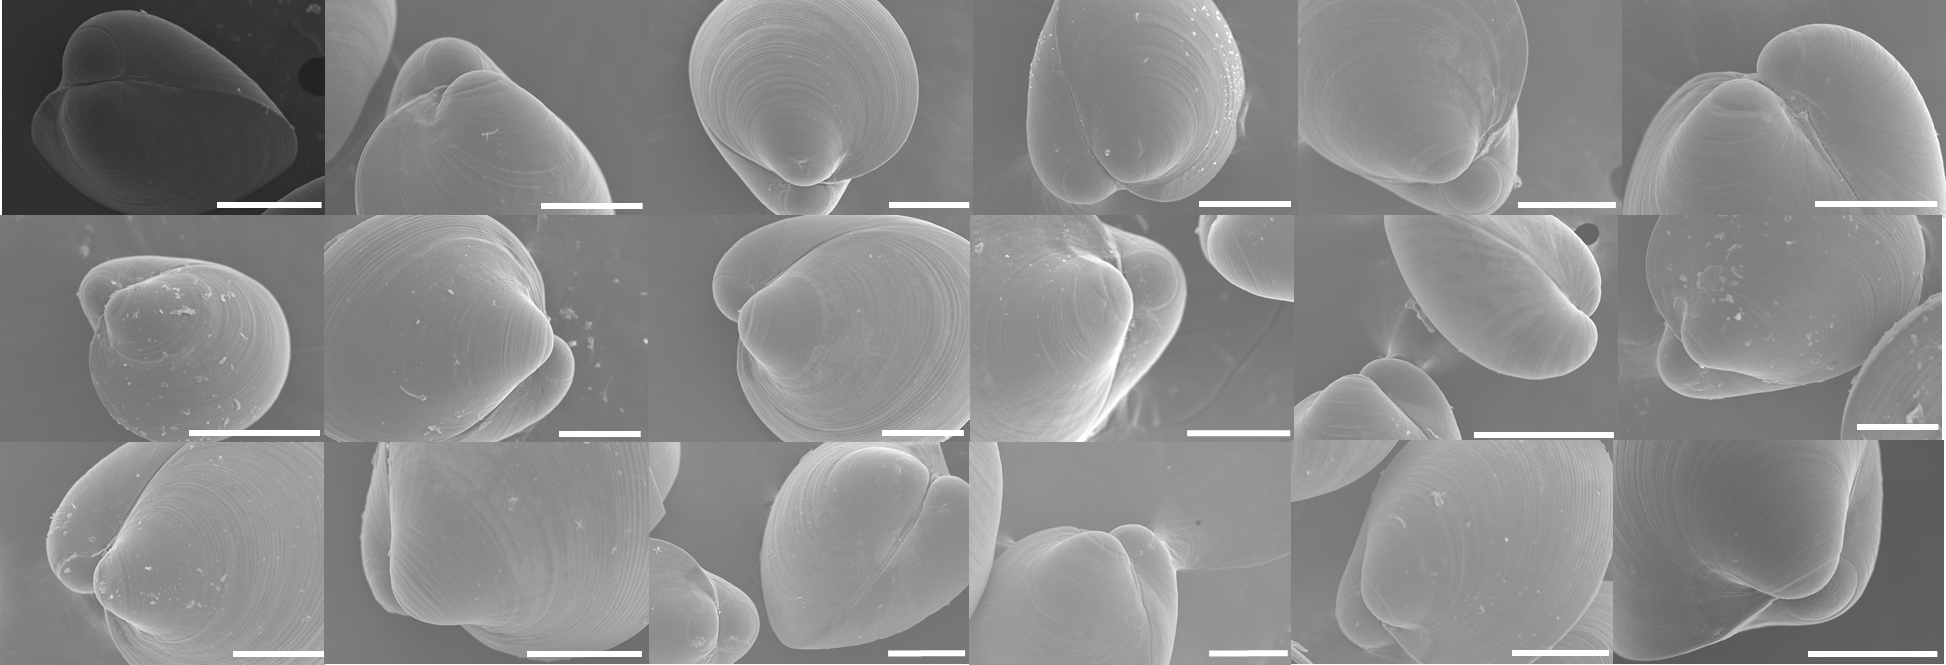


**Figure S3:** No dissolution in larval shells grown under control-control condition – replicates from all the three replicate tanks (6 replicates from each tank). Scale bar: 100 µm.


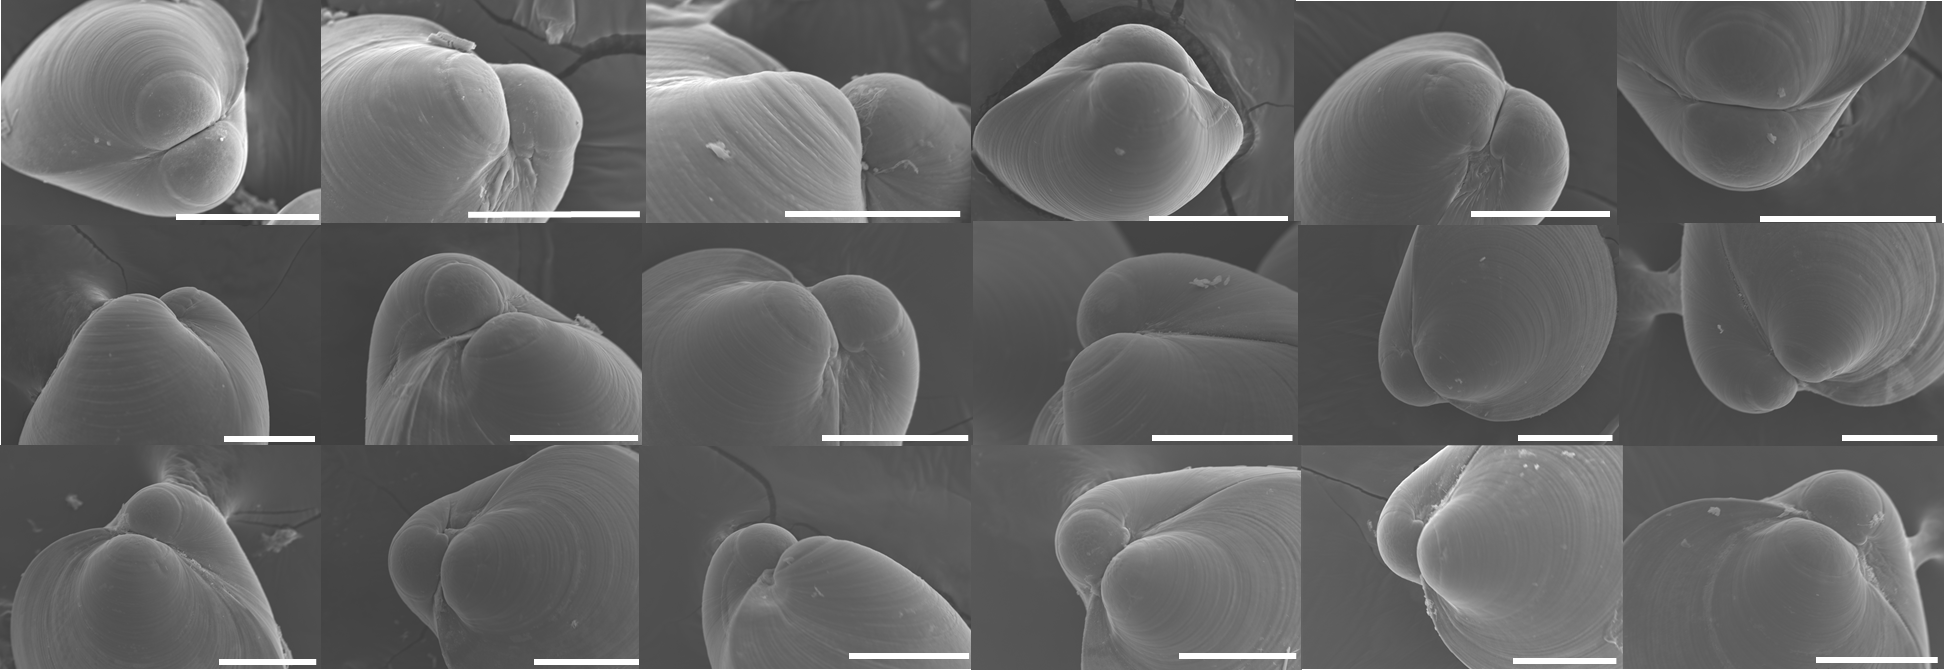


**Figure S4:** No dissolution in larval shells grown under OA-Control condition – replicates from all the three tanks (6 replicates from each tank). Scale bar: 100 µm.


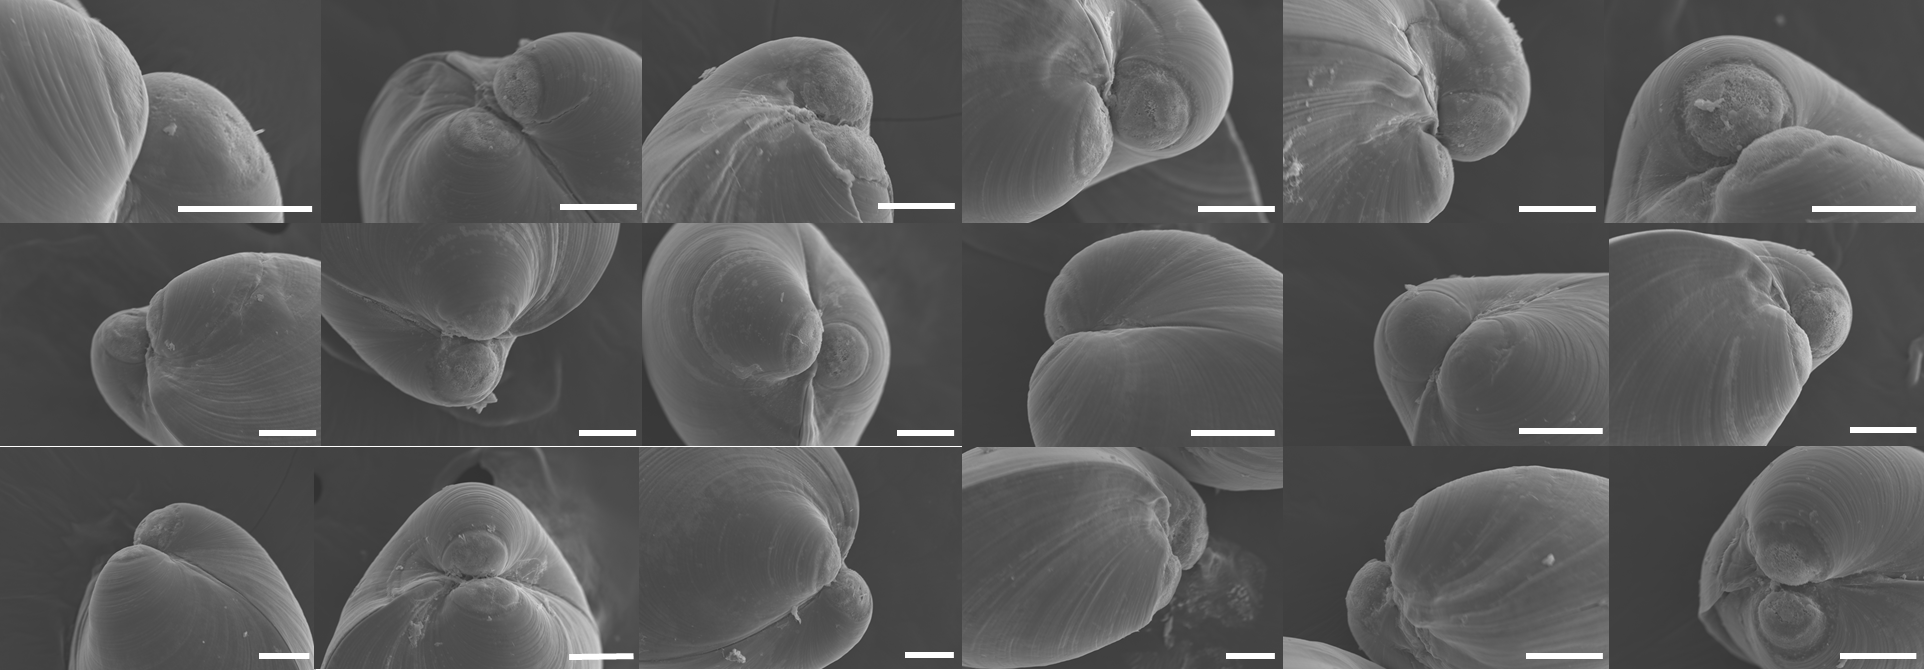


**Figure S5:** Larval shell dissolution near hinge in Control-OA condition – replicates from all the three replicate tanks (6 replicates from each tank). Scale bar: 50 µm.


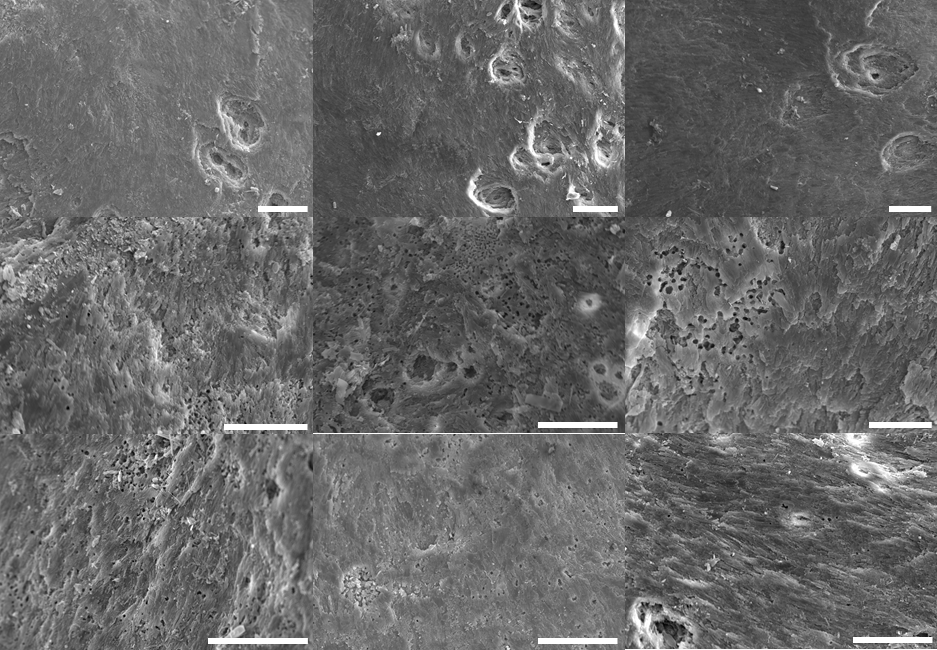


**Figure S6**: Dissolution of prismatic layer near the hinge region of the shell in OA-OA condition – replicates from all the three tanks (3 replicates from each tank, each row represents a replicate tank). Scale bar: 50 µm.


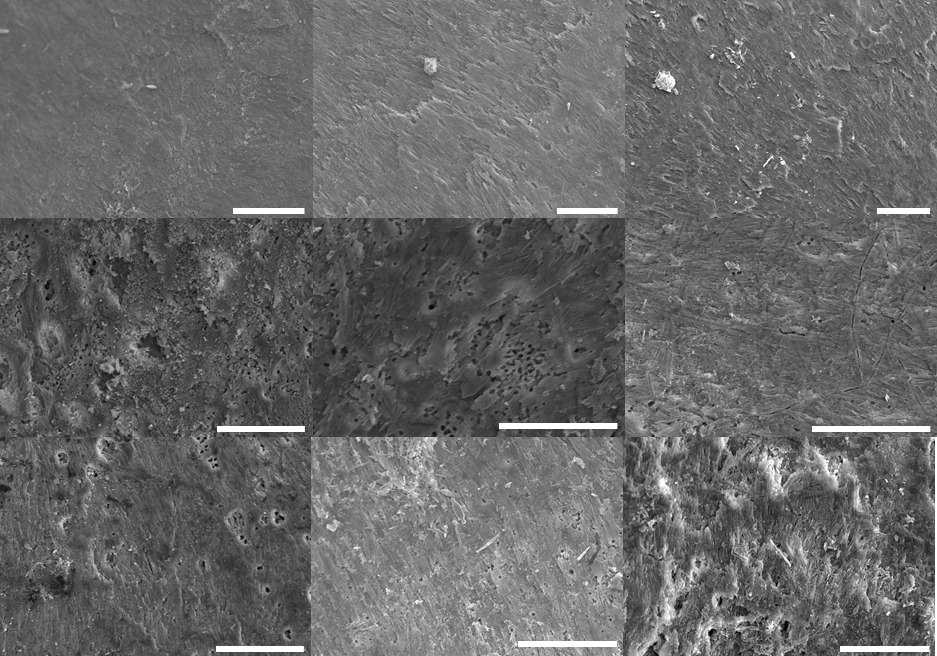


**Figure S7**: Dissolution of prismatic layer near the middle region of the shell in OA-OA condition – replicates from all the three tanks (3 replicates from each tank, each row represents a replicate tank). Scale bar: 50 µm.


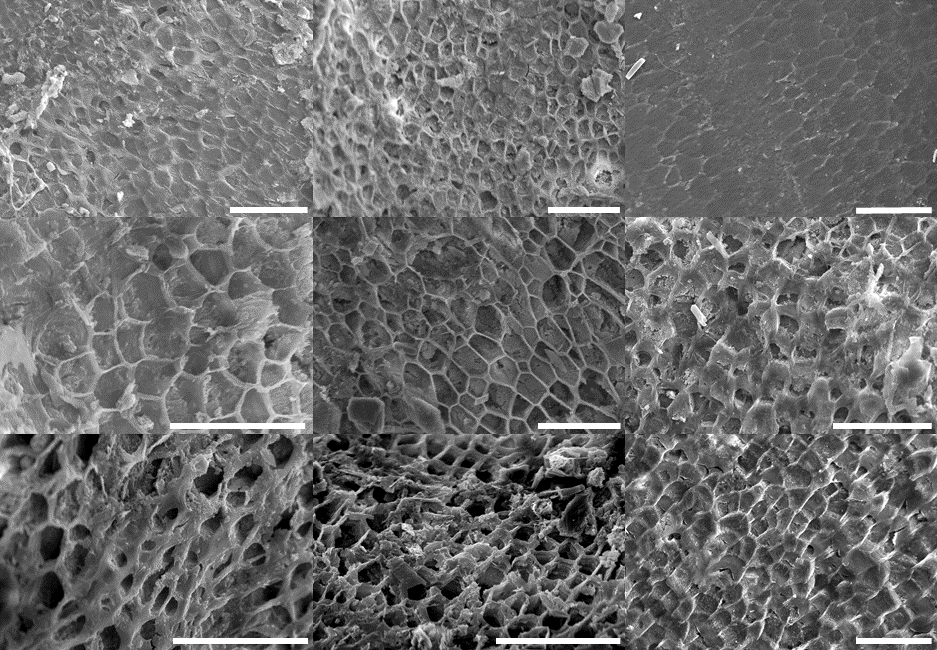


**Figure S8**: Prismatic layer remains intact near the edge region (newly formed) of the shell in OA-OA condition – replicates from all the three tanks (3 replicates from each tank, each row represents a replicate tank). Scale bar: 50 µm.


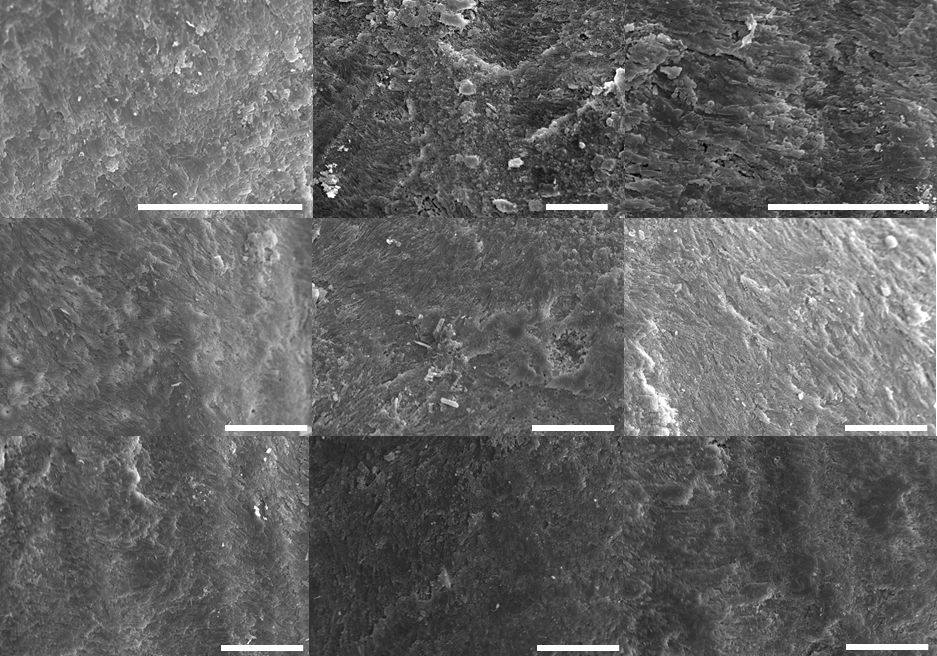


**Figure S9**: Dissolution of prismatic layer near the hinge region of the shell in Control-Control condition – replicates from all the three tanks (3 replicates from each tank, each row represents a replicate tank). Scale bar: 50 µm.


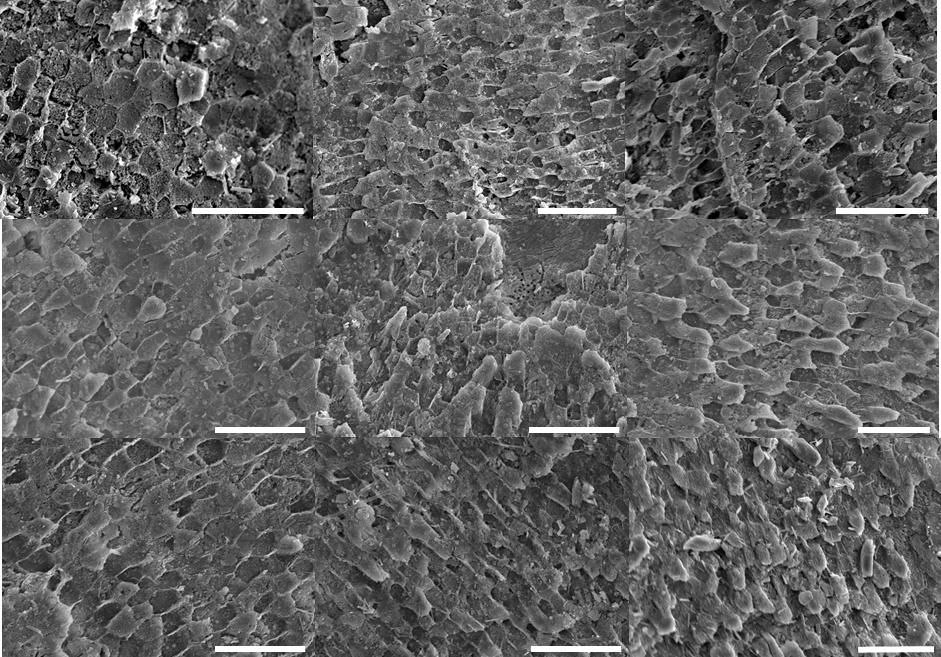


**Figure S10:** Prismatic layer in the middle region of the shell surface remains intact in Control-Control condition – replicates from all the three tanks (3 replicates from each tank, each row represents a replicate tank). Scale bar: 50 µm.


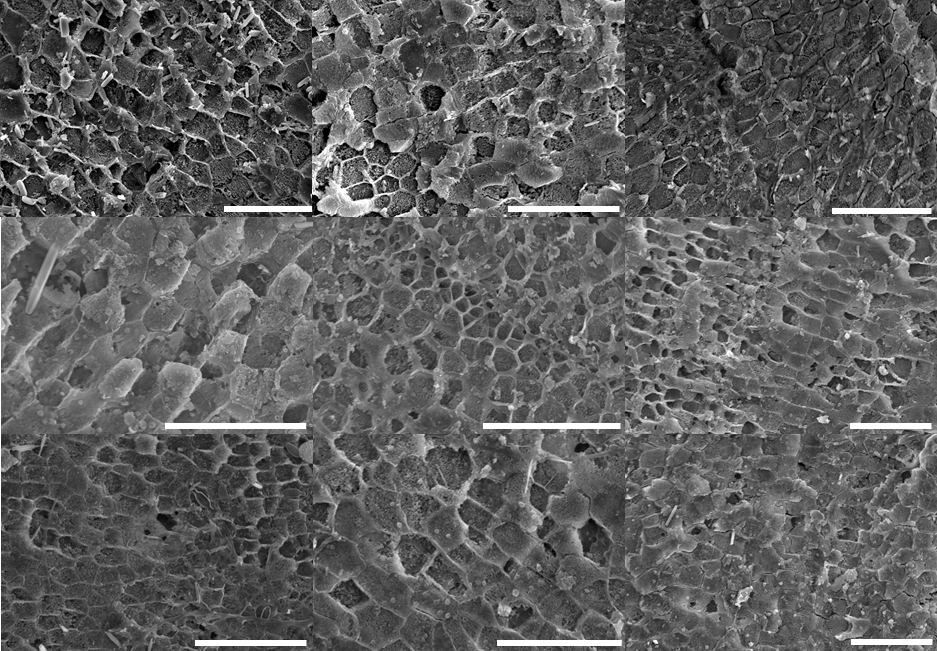


**Figure S11:** Prismatic layer in the edge of the shell surface (newly formed) remains intact in Control-Control condition – replicates from all the three tanks (3 replicates from each tank, each row represents a replicate tank). Scale bar: 50 µm.


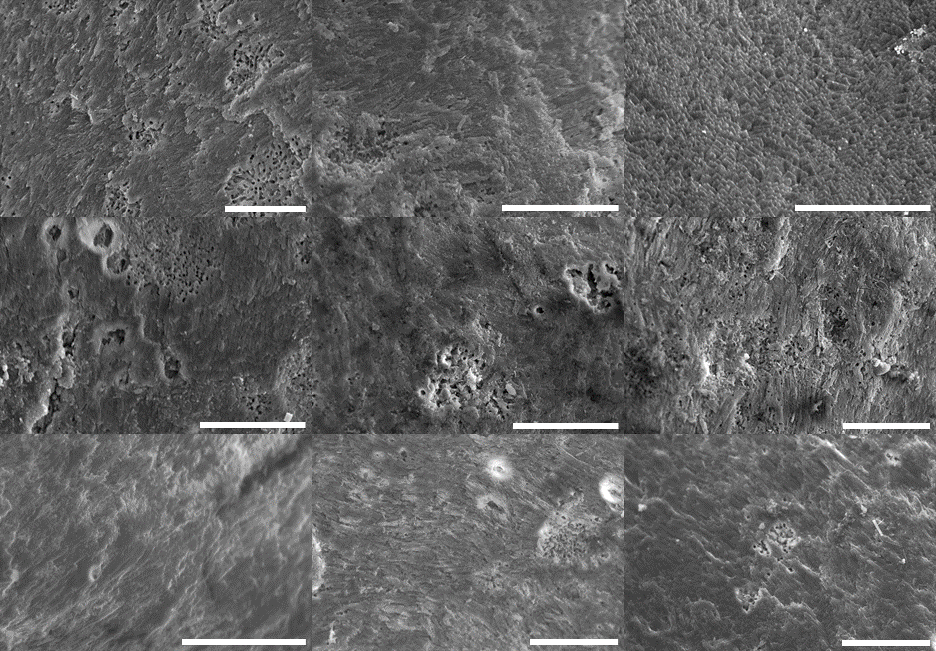


**Figure S12:** Dissolution of prismatic layer near the hinge shell surface in OA-Control condition – replicates from all the three tanks (3 replicates from each tank, each row represents a replicate tank). Scale bar: 50 µm.


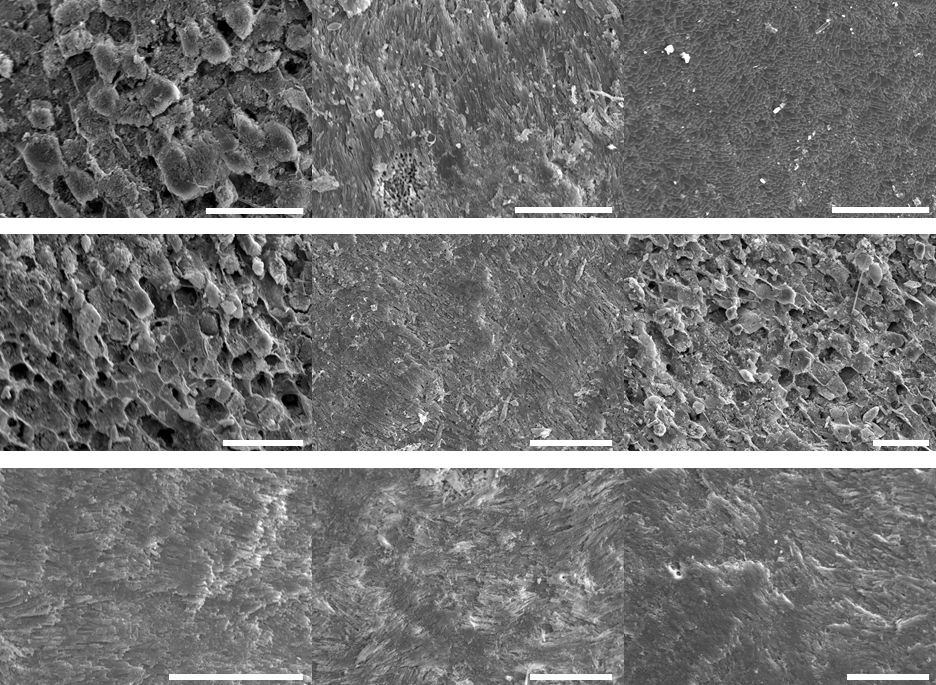


**Figure S13:** Dissolution of prismatic layer in the middle shell surface in OA-Control condition – replicates from all the three tanks (3 replicates from each tank, each row represents a replicate tank). Scale bar: 50 µm.


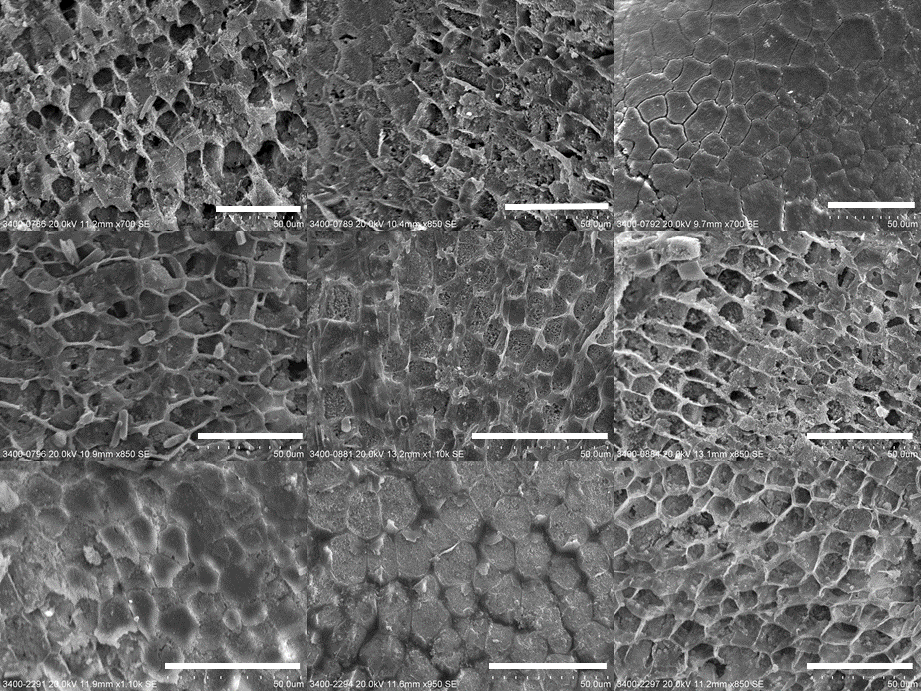


**Figure S14:** Prismatic layer remains intact in the shell edge surface (newly formed) in OA-Control condition – replicates from all the three tanks (3 replicates from each tank, each row represents a replicate tank). Scale bar: 50 µm.


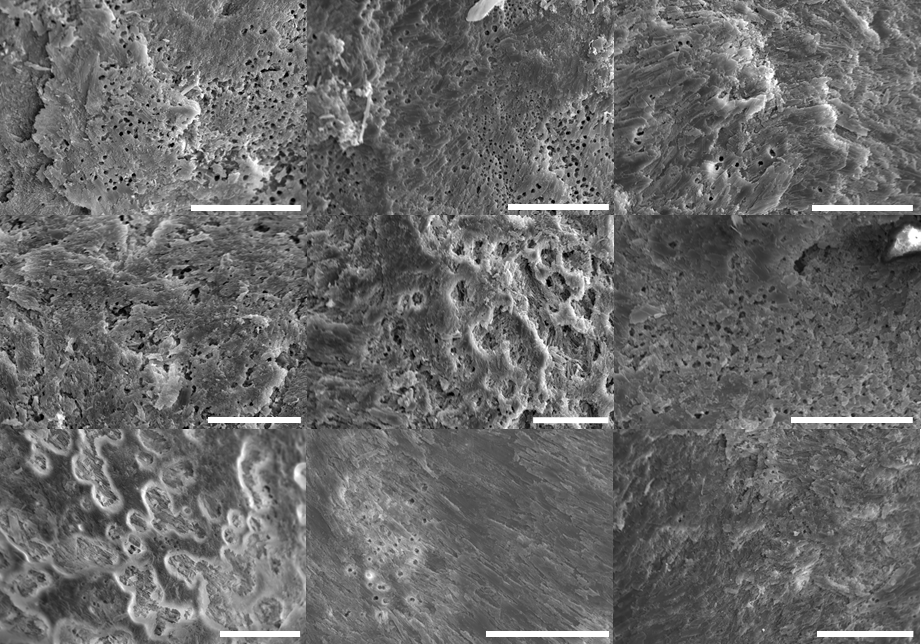


**Figure S15:** Dissolution of prismatic layer near the hinge shell surface in Control-OA condition – replicates from all the three tanks (3 replicates from each tank, each row represents a replicate tank). Scale bar: 50 µm.


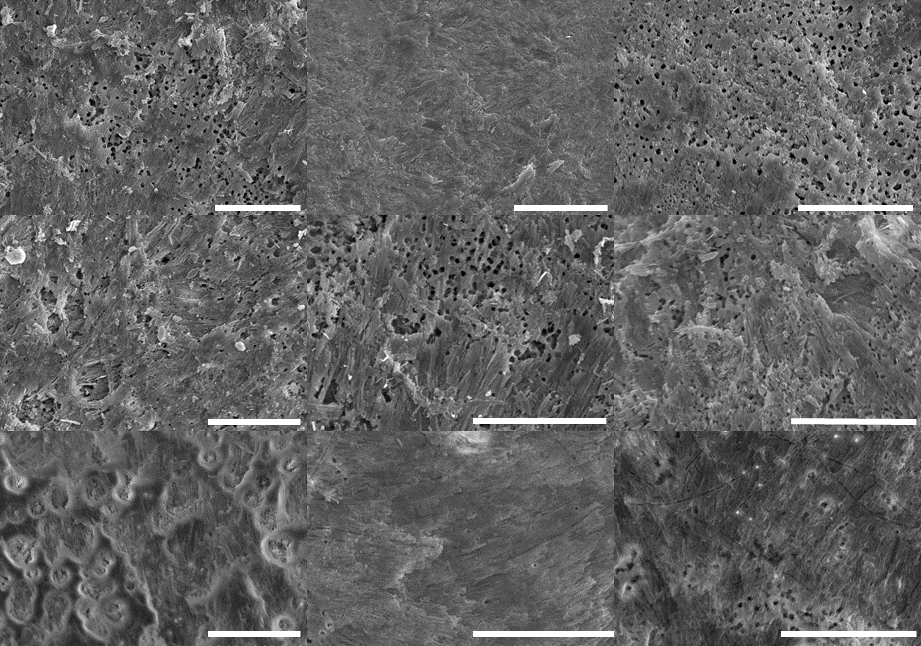


**Figure S16:** Dissolution of prismatic layer in the middle shell surface in Control-OA condition – replicates from all the three tanks (3 replicates from each tank, each row represents a replicate tank). Scale bar: 50 µm.


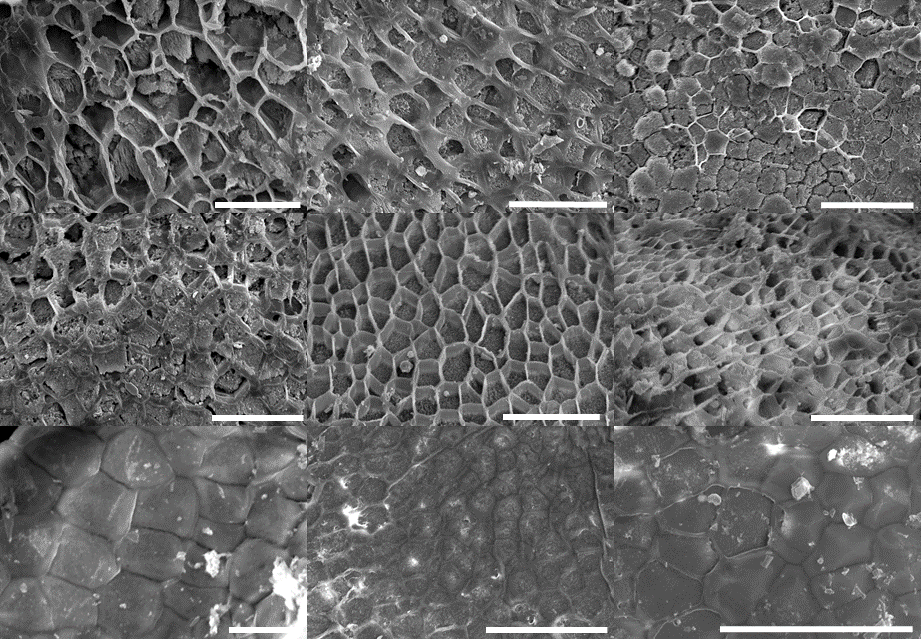


**Figure S17:** Prismatic layer on shell edge surface remains intact in Control-OA condition – replicates from all the three tanks (3 replicates from each tank, each row represents a replicate tank). Scale bar: 50 µm.


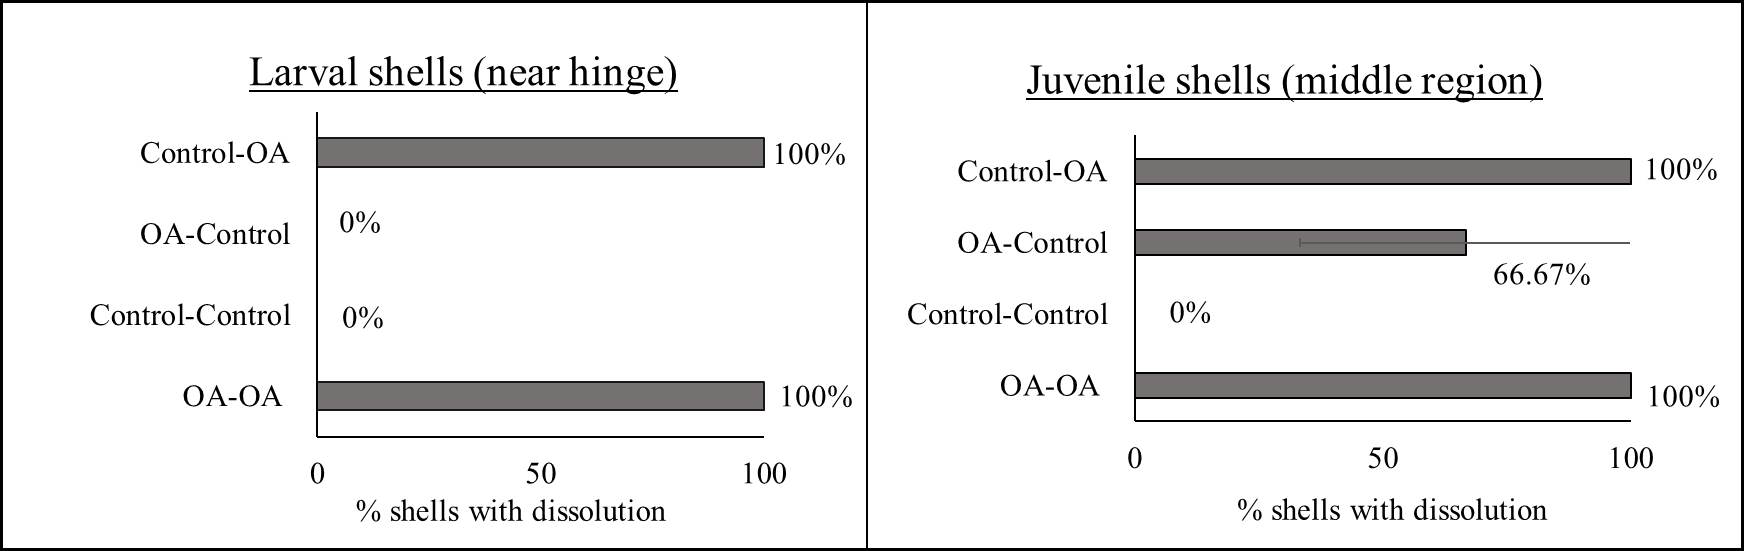


**Figure S18**: Percentage calculations for shell dissolution in larvae (hinge) and juveniles (middle region). Error bar: Standard deviation.

**
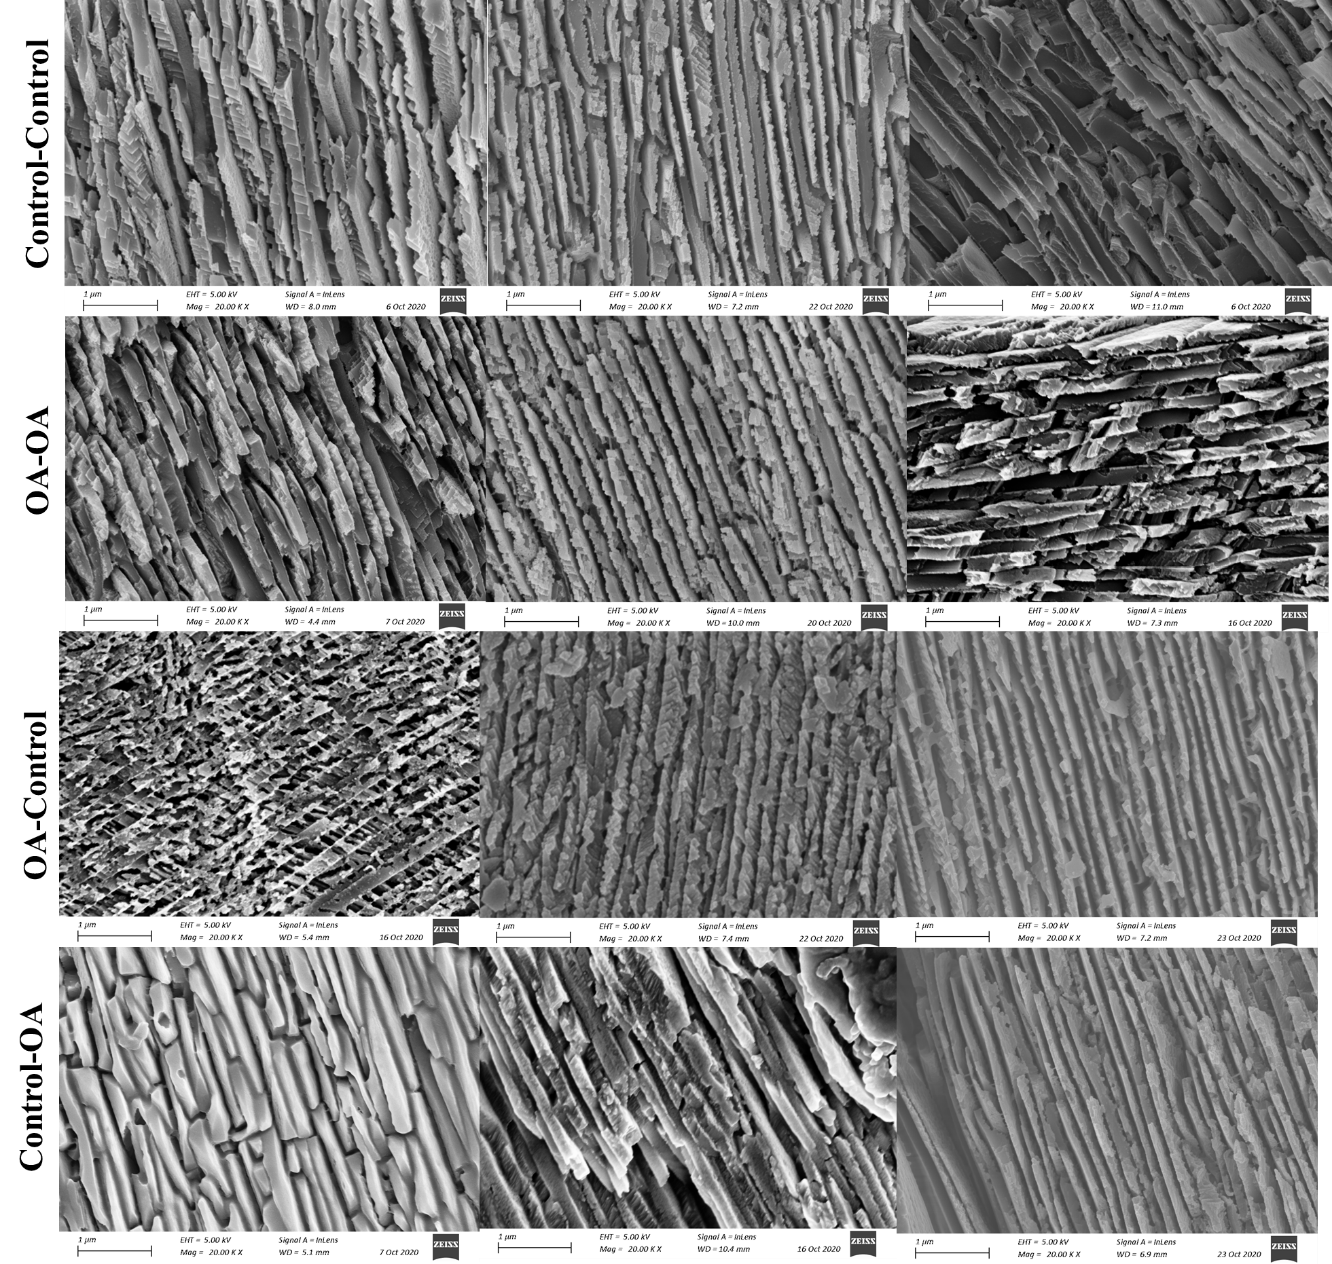
**

**Figure S19:** Intact folia layer under all the four treatment conditions (3 replicates shown for each treatment).


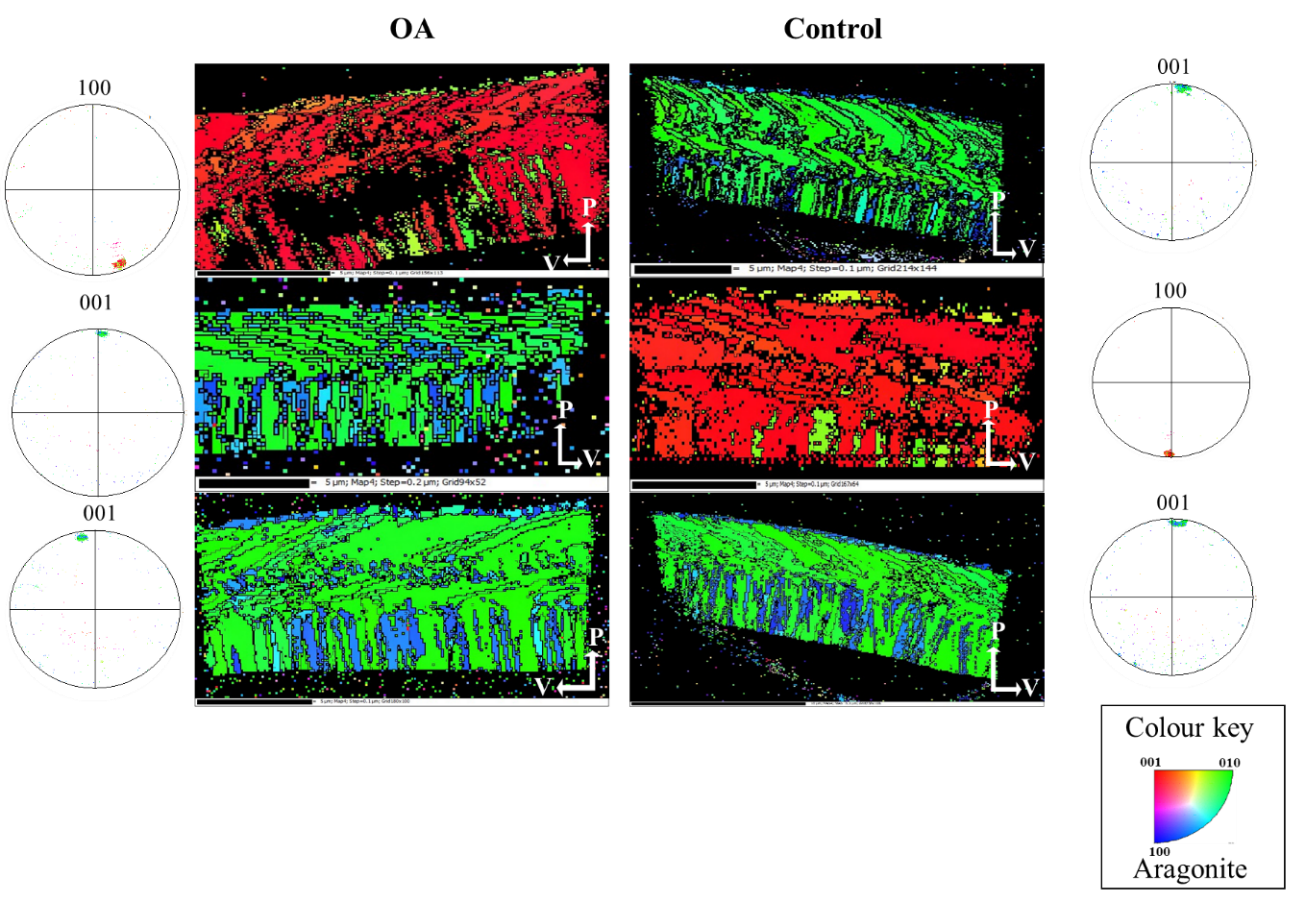


**Figure S20: SEM-EBSD of all the larval cross sections cut using FIB**: Orientation maps in the centre with pole figures on the side corresponding to the orientation maps. Colours in the crystal orientation maps are according to the colour key – each colour denoting slight changes in crystal orientation.


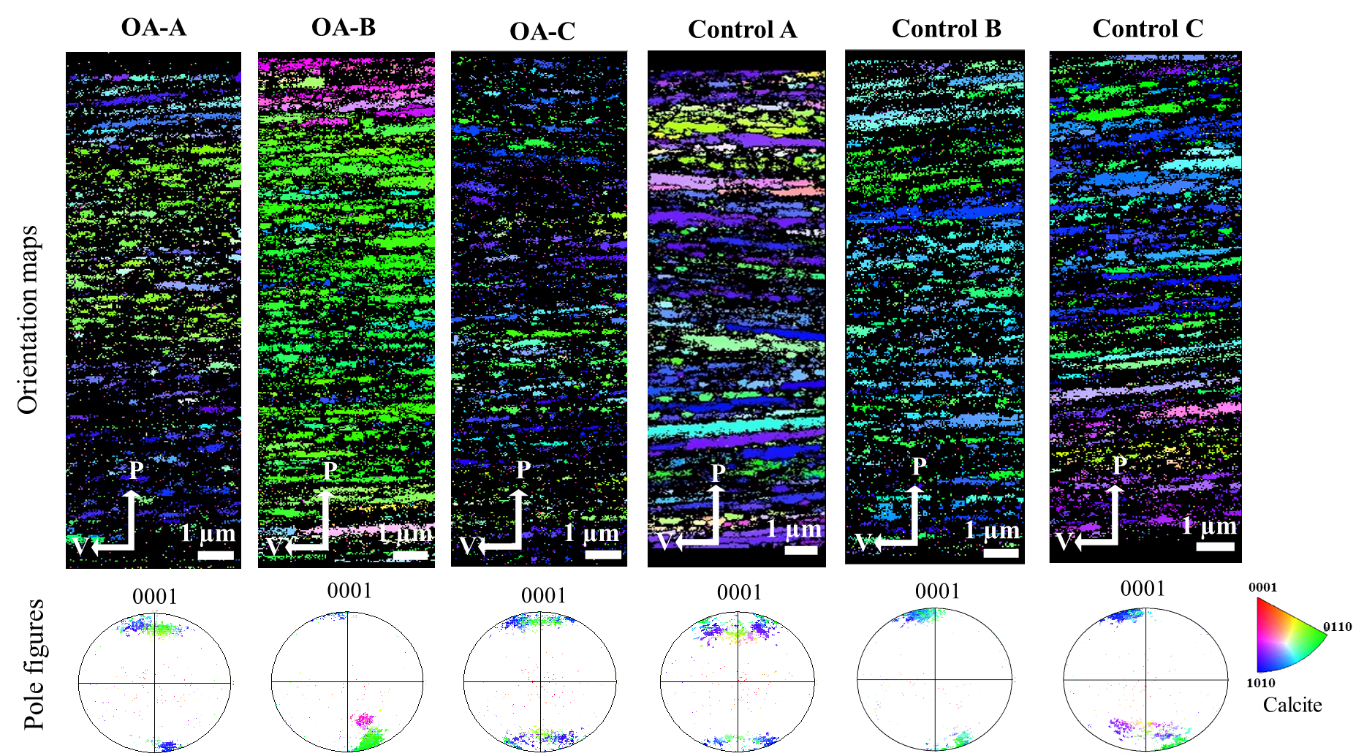


**Figure S21: Crystal orientation maps of folia layer and corresponding pole figures**. Colours in the orientation map and pole figures denote slight changes in crystal orientation. Colour changes are according to the calcite colour key provided in the colour key at the bottom.


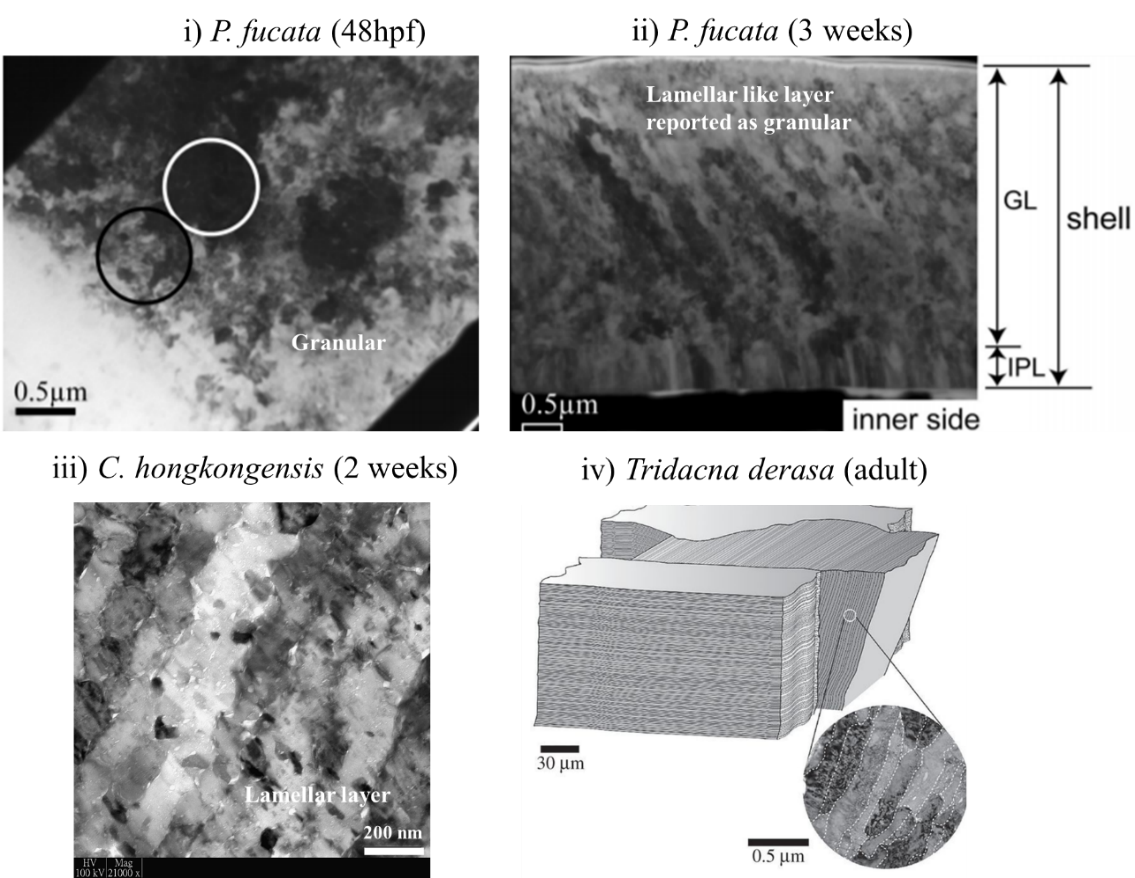


**Figure S22.** Granular and lamellar layer nanostructure i) TEM cross section of P. fucata larvae 48 hours post fertilisation showing granular layer (Yokoo, Suzuki et al. 2011) ii) TEM cross section of P. fucata larvae 3 weeks post fertilisation showing lamellar layer (Yokoo, Suzuki et al. 2011), reported in the previous study as granular layer (GL) iii) TEM cross section of C. hongkongensis larvae showing lamellar layer iv) Lamellar layer of adult giant clam *Tridacna derasa* (Agbaje, Wirth et al. 2017) for reference to compare granular and lamellar layers from larval shell cross sections (i, ii and iii) show in this figure.

**References**

Agbaje, O., R. Wirth, L. Morales, K. Shirai, M. Kosnik, T. Watanabe and D. E. Jacob (2017). "Architecture of crossed-lamellar bivalve shells: the southern giant clam (Tridacna derasa, Röding, 1798)." Royal Society open science **4**(9): 170622.

Lim, Y.-K., X. Dang and V. Thiyagarajan (2021). "Transgenerational responses to seawater pH in the edible oyster, with implications for the mariculture of the species under future ocean acidification." Science of The Total Environment **782**: 146704.

Yokoo, N., M. Suzuki, K. Saruwatari, H. Aoki, K. Watanabe, H. Nagasawa and T. Kogure (2011). "Microstructures of the larval shell of a pearl oyster, Pinctada fucata, investigated by FIB-TEM technique." American Mineralogist **96**(7): 1020-1027.
